# Supplementary material
Source: PubMed Central journal article supplement (PMC6148759)
Supplement: NIHMS1500752-supplement-2.pdf [file NIHMS1500752-supplement-2.pdf]

| Target  | Fluorochrome | Vendor         | Reference  | Clone    |
|---------|--------------|----------------|------------|----------|
| B220    | RPE          | BD Biosciences | 553089     | RA3-6B2  |
| B220    | PE-Cy7       | BD Biosciences | 552772     | RA3-6B2  |
| c-kit   | RPE          | eBioscience    | 12-1171-83 | 2B8      |
| CD115   | BV 421       | Biolegends     | 135513     | AFS98    |
| CD11B   | APC/Cy7      | Biolegends     | 101226     | M1/70    |
| CD11C   | RPE          | eBioscience    | 12-0114-83 | N418     |
| CD19    | RPE          | Biolegends     | 115508     | 6D5      |
| CD3     | RPE          | Biolegends     | 100206     | 17A2     |
| CD31    | RPE          | BD Bioscience  | 553373     | MEC 13.3 |
| CD45    | BV 711       | Biolegends     | 103147     | 30-F11   |
| CD45    | APC          | Biolegends     | 109814     | 104      |
| CD90    | RPE          | Biolegends     | 140308     | 53-2.1   |
| F4/80   | PE-Cy7       | Biolegends     | 123114     | BM8      |
| Ly6C    | FITC         | BD Pharmingen  | 553104     | AL-21    |
| Ly6C    | BV 605       | Biolegends     | 128035     | HK1.4    |
| Ly6C    | APC          | BD Biosciences | 560595     | AL-21    |
| Ly6G    | FITC         | Biolegends     | 127606     | 1A8      |
| Ly6G    | PerCP/Cy5.5  | Biolegends     | 127616     | 1A8      |
| Ly6G    | APC          | Biolegends     | 127614     | 1A8      |
| NK1.1   | RPE          | Biolegends     | 108708     | PK136    |
| Ter 119 | RPE          | BD Pharmingen  | 553673     | TER-119  |
| Ly6C    | PerCP/Cy5.5  | Biolegends     | 128012     | HK1.4    |

**Supplementary Table 1**

**List of antibodies used for flow cytometry experiments**
